# Supplementary material for: Tnfaip3 expression in pulmonary conventional type 1 Langerin‐expressing dendritic cells regulates T helper 2‐mediated airway inflammation in mice
Source: PubMed Central journal article supplement — Allergy. 2020 Jun 14;75(10):2587–98. doi: 10.1111/all.14334 (PMC7687104; doi:10.1111/all.14334), 2020-06-14
Supplement: ALL-75-2587-s010.pdf [file ALL-75-2587-s010.pdf]

**Table S1** Antibodies used for flow cytometry

| <b>Antibody</b> | <b>Conjugate</b> | <b>Clone</b> | <b>Company</b> |
|-----------------|------------------|--------------|----------------|
| CD103           | eF450            | 2E7          | eBioscience    |
| CD11b           | PerCP-Cy5.5      | M1/70        | BD Biosciences |
| CD11c           | PE-TxR           | N418         | eBioscience    |
| CD19            | APC-eFluor 780   | ID3          | eBioscience    |
| CD207           | Alexa-fluor 647  | 929F3.01     | Dendritics     |
| CD3             | PE-CF594         | 145-2C11     | BD Biosciences |
| CD3             | APC-eF780        | 17A2         | eBioscience    |
| CD4             | BV711            | RM4-5        | BD Biosciences |
| CD4             | BV605            | L3T4         | BD Biosciences |
| CD64            | BV711            | X54-5/7.1    | Biologend      |
| CD69            | FITC             | H1.2F3       | eBioscience    |
| CD8             | PE-Cy7           | 53-6.7       | eBioscience    |
| CD86            | PE-Cy7           | GL1          | BD Biosciences |
| FoxP3           | PE-Cy7           | FJK-16s      | eBioscience    |
| GR-1            | Pe-Cy7           | RB6-8C5      | eBioscience    |
| IFN $\gamma$    | EF450            | XMG1.2       | eBioscience    |
| IL-12           | PE               | C17.8        | eBioscience    |
| IL-13           | EF660            | eBio13A      | eBioscience    |
| IL-17A          | AF700            | TC11-18H10.1 | BD Biosciences |
| IL-5            | PE               | TRFK-5       | BD Biosciences |
| MHCII           | Alexa Fluor 700  | M5/114.15.2  | eBioscience    |
| PD-L1           | biotin           | B7-H1        | eBioscience    |
| Siglec F        | PE               | E50-2440     | BD Biosciences |
