# Supplementary figures and images for: Tnfaip3 expression in pulmonary conventional type 1 Langerin‐expressing dendritic cells regulates T helper 2‐mediated airway inflammation in mice
Source: PubMed Central journal article supplement — Allergy. 2020 Jun 14;75(10):2587–98. doi: 10.1111/all.14334 (PMC7687104; doi:10.1111/all.14334), 2020-06-14

Supplementary Figure 6

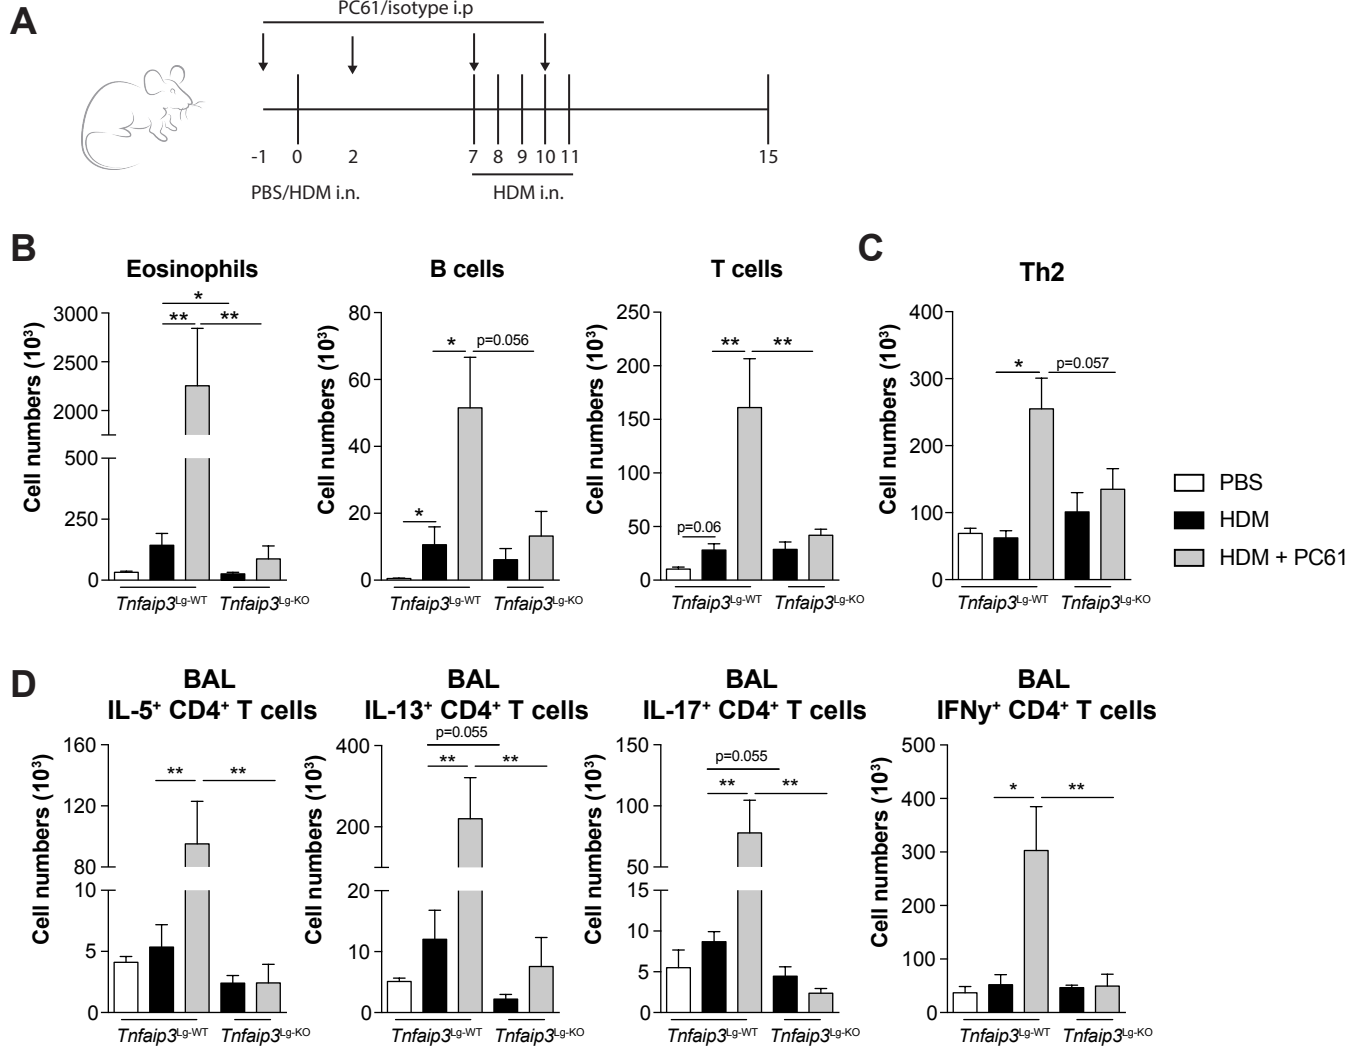

Supplement: ALL-75-2587-s006.pdf [file ALL-75-2587-s006.pdf]
